# Supplementary material for: Development of leaf-adhesive pesticide nanocapsules with pH-responsive release to enhance retention time on crop leaves and improve utilization efficiency
Source: Royal Society of Chemistry journal article supplement (doi:10.1039/d0tb02430a), 2020-12-08
Supplement: d0tb02430a1.pdf [file d0tb02430a1.pdf]

# **Electronic supplementary information for Development of Leaf-adhesive Pesticide Nanocapsules with pH-responsive Release to Enhance Retention Time on Crop Leaves and Improve Utilization Efficiency**

Hongyan Chen,<sup>†</sup> Heng Zhi,<sup>†</sup> Jie Liang, Manli Yu, Bo Cui, Xiang Zhao, Changjiao Sun, Yan Wang, Haixin Cui\* and Zhanghua Zeng\*

cuihaixin@caas.cn and zengzhanghua@caas.cn

Institute of Environment and Sustainable Development in Agriculture, Chinese

Academy of Agricultural Sciences, Beijing, 100081, PR China

## **Contents**

**1, Supplementary scheme.**

**2, Supplementary figures.**

**3, Supplementary table.**

## 1, Supplementary scheme

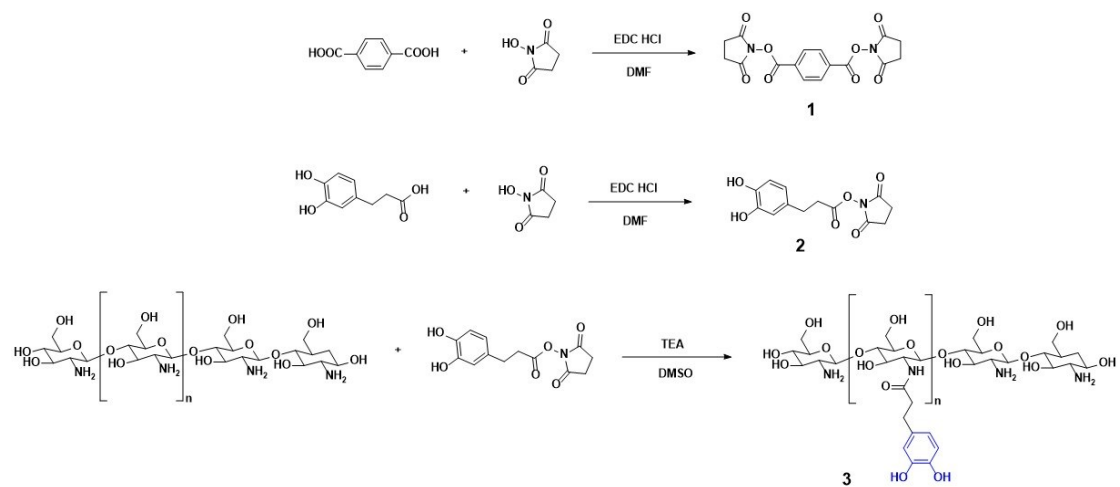

**Scheme S1.** The synthetic route for compounds **1**, **2**, and **3**.

## 2, Supplementary figures.

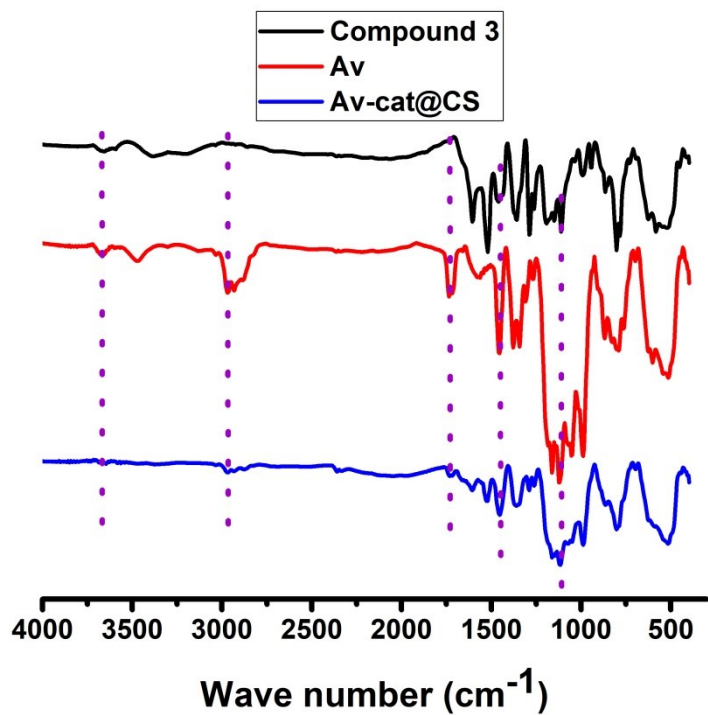

**Fig. S1.** FT-IR spectra of compound 3, Av, and Av-cat@CS.

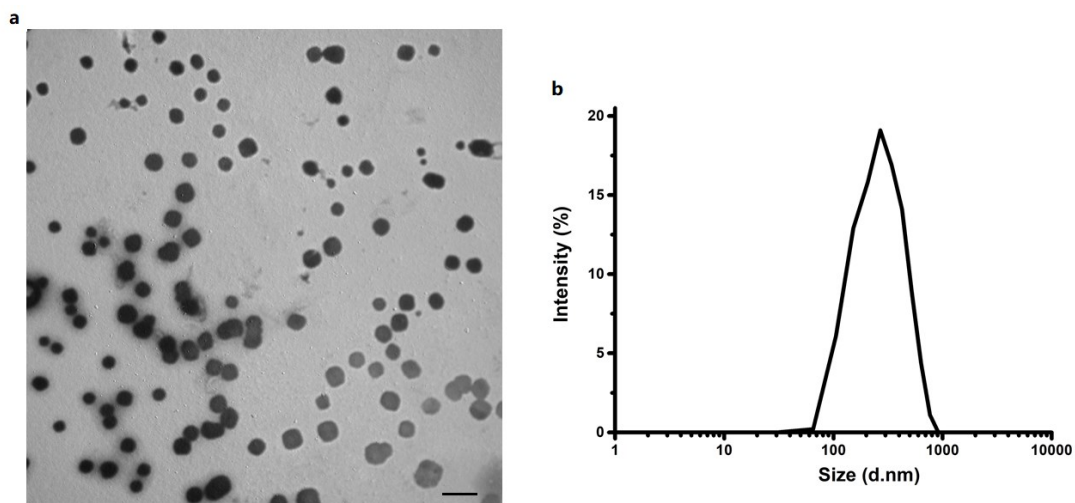

**Fig. S2.** TEM image (a) and hydrodynamic size distributions (b) of Av-cat@CS. The scale bar in the SEM image is 500 nm.

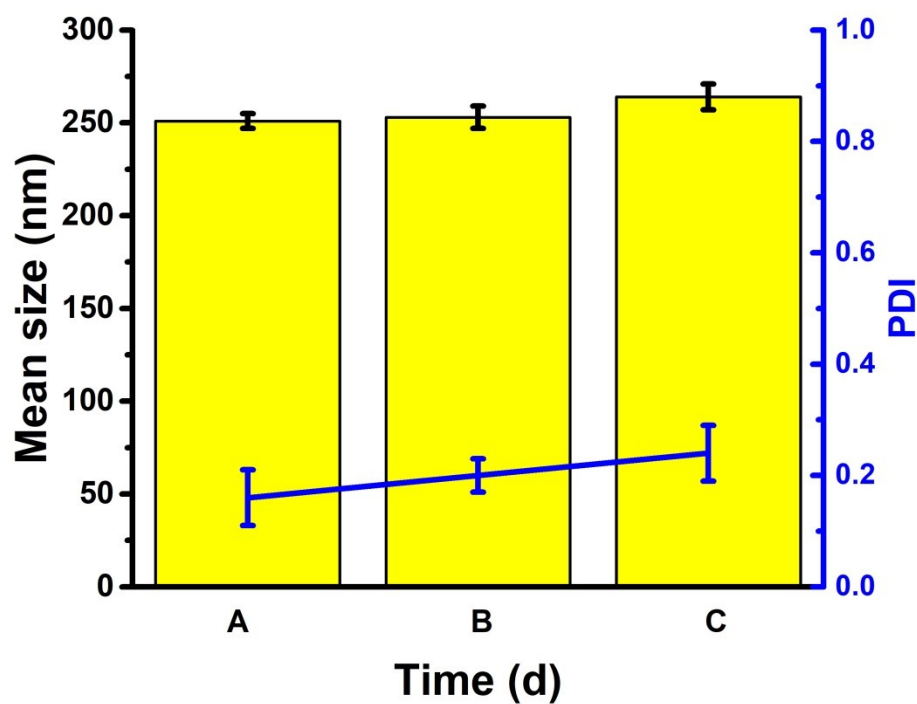

**Fig. S3.** Time-dependent changes of the hydrodynamic mean size and PDI of the Av-pH-cat@CS at 25 °C. Column A, B and C referred to 0, 14 and 180 days storage.

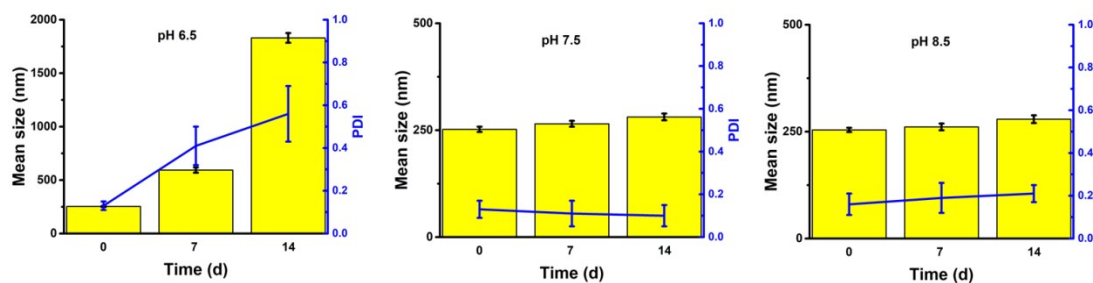

**Fig. S4.** Time-dependent changes of the hydrodynamic mean size and PDI of the Av-pH-cat@CS at different pH at room temperature.

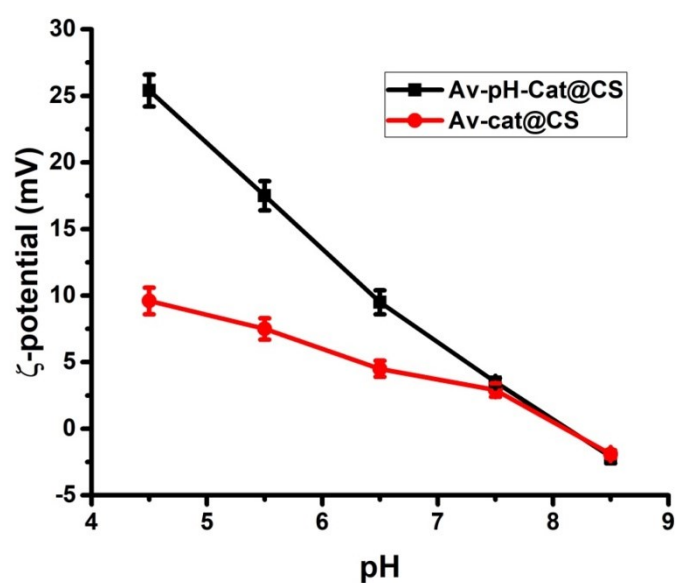

**Fig. S5.** The  $\zeta$ -potential changes of Av-pH-cat@CS and Av-cat@CS under various pH conditions.

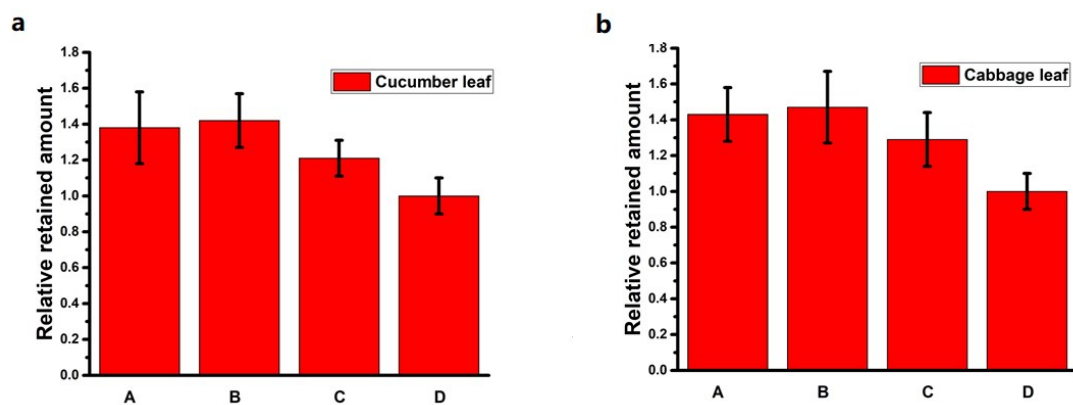

**Fig. S6.** The relative retained amount of Av-pH-cat@CS, Av-cat@CS, EC and WDG on cucumber (a) and cabbage leaf (b) based on the leaf dipping method. The retained amount of WDG on crop leaves was set to be 1.0. Columns A to D refer to Av-pH-cat@CS, Av-cat@CS, EC, and WDG, respectively.

### 3, Supplementary table

**Table S1.** The contact angles (CA) on cucumber and broccoli foliage surface.

| Samples          | CA on cucumber (°) | CA on broccoli (°) |
|------------------|--------------------|--------------------|
| H <sub>2</sub> O | 79.4±5.9°          | 131.2±7.7          |
| Av-pH-cat@CS     | 61.5±6.4           | 111.1±2.9          |
| Av-pH @CS        | 67.2±4.3           | 124.7±4.2          |
| Av-cat@CS        | 63.5±4.1           | 109.2±7.1          |
| Av-cat@CS        | 68.4±3.2           | 122.4±4.8          |
